# Supplementary material for: Widening inequalities in multimorbidity? Time trends among the working population between 2005 and 2015 based on German health insurance data
Source: Springer Nature journal article supplement (doi:10.1186/s12939-018-0815-z), 2018-07-16
Supplement: MOESM3 [file 15956664]

### **Additional file 3**

#### **Widening inequalities in multimorbidity? Time trends among the working population between 2005 and 2015 based on German health insurance data**

Juliane Tetzlaff<sup>1</sup>, Jelena Epping<sup>1</sup>, Stefanie Sperlich<sup>1</sup>, Sveja Eberhard<sup>2</sup>, Jona Theodor Stahmeyer<sup>2</sup>, Siegfried Geyer<sup>1</sup>

<sup>1</sup> Medical Sociology Unit, Hannover Medical School, Hannover, Germany

<sup>2</sup> AOK Niedersachsen- Statutory Health Insurance of Lower Saxony, Hannover, Germany

Additional file 3. Logistic GEE-regression on multimorbidity prevalence risks by SES indicators, age, and calendar year stratified for gender, including interactions year\*SES indicator (AOK Niedersachsen, 2005-2015)

|                                                    | Men                       |             |          | Women                     |             |          |
|----------------------------------------------------|---------------------------|-------------|----------|---------------------------|-------------|----------|
|                                                    | OR                        | 95%-CI      | <i>p</i> | OR                        | 95%-CI      | <i>p</i> |
| <b>Model 1: Interaction year*educational level</b> |                           |             |          |                           |             |          |
| <b>Year</b>                                        | 1.10                      | (1.09-1.10) | <0.001   | 1.06                      | (1.05-1.06) | <0.001   |
| <b>Educational level</b>                           |                           |             |          |                           |             |          |
| low                                                | 1                         |             |          | 1                         |             |          |
| high                                               | 0.62                      | (0.52-0.75) | <0.001   | 0.50                      | (0.42-0.60) | <0.001   |
| missing                                            | 0.92                      | (0.87-0.98) | 0.013    | 0.93                      | (0.87-0.99) | 0.029    |
| <b>Year*educational level</b>                      |                           |             |          |                           |             |          |
| low                                                | 1                         |             |          | 1                         |             |          |
| high                                               | 1.01                      | (0.99-1.03) | 0.225    | 1.03                      | (1.01-1.05) | 0.005    |
| missing                                            | 0.99                      | (0.98-1.00) | 0.014    | 1.00                      | (0.99-1.01) | 0.561    |
| <b>Income</b>                                      |                           |             |          |                           |             |          |
| low                                                | 1                         |             |          | 1                         |             |          |
| middle                                             | 0.83                      | (0.79-0.86) | <0.001   | 0.92                      | (0.89-0.94) | <0.001   |
| high                                               | 0.72                      | (0.69-0.75) | <0.001   | 0.91                      | (0.88-0.95) | <0.001   |
| missing                                            | 0.83                      | (0.80-0.87) | <0.001   | 1.05                      | (1.02-1.09) | 0.001    |
| <b>Occupational group</b>                          |                           |             |          |                           |             |          |
| unskilled                                          | 1                         |             |          | 1                         |             |          |
| skilled                                            | 0.88                      | (0.86-0.88) | <0.001   | 0.91                      | (0.88-0.94) | <0.001   |
| specialists                                        | 1.03                      | (0.99-1.03) | 0.125    | 0.81                      | (0.78-0.84) | <0.001   |
| highly qualified                                   | 0.82                      | (0.77-0.88) | <0.001   | 0.79                      | (0.73-0.86) | <0.001   |
| missing                                            | 0.78                      | (0.74-0.82) | <0.001   | 0.63                      | (0.58-0.68) | <0.001   |
| <b>Age</b>                                         | 1.15                      | (1.14-1.15) | <0.001   | 1.13                      | (1.12-1.13) | <0.001   |
| Number of subjects                                 |                           | 407,274     |          |                           | 293,570     |          |
| Number of observations                             |                           | 2,835,451   |          |                           | 1,973,699   |          |
| Wald Chi <sup>2</sup> ( <i>p</i> )                 | 29904.02 (df=13) (<0.001) |             |          | 18082.17 (df=13) (<0.001) |             |          |
| <b>Model 2: Interaction year*income</b>            |                           |             |          |                           |             |          |
| <b>Year</b>                                        | 1.08                      | (1.07-1.09) | <0.001   | 1.05                      | (1.05-1.06) | <0.001   |
| <b>Income</b>                                      |                           |             |          |                           |             |          |
| low                                                | 1                         |             |          | 1                         |             |          |
| middle                                             | 0.86                      | (0.77-0.95) | 0.003    | 0.89                      | (0.84-0.95) | <0.001   |
| high                                               | 0.64                      | (0.58-0.70) | <0.001   | 0.85                      | (0.79-0.92) | <0.001   |
| missing                                            | 0.76                      | (0.69-0.84) | <0.001   | 1.00                      | (0.93-1.07) | 0.935    |
| <b>Year*income</b>                                 |                           |             |          |                           |             |          |
| low                                                | 1                         |             |          | 1                         |             |          |
| middle                                             | 1.00                      | (0.98-1.01) | 0.501    | 1.00                      | (1.00-1.01) | 0.270    |
| high                                               | 1.02                      | (1.01-1.03) | 0.005    | 1.01                      | (1.00-1.02) | 0.019    |
| missing                                            | 1.01                      | (1.00-1.03) | 0.040    | 1.01                      | (1.00-1.02) | 0.067    |
| <b>Educational level</b>                           |                           |             |          |                           |             |          |
| low                                                | 1                         |             |          | 1                         |             |          |
| high                                               | 0.68                      | (0.63-0.74) | <0.001   | 0.62                      | (0.57-0.67) | <0.001   |
| missing                                            | 0.87                      | (0.84-0.90) | <0.001   | 0.94                      | (0.91-0.98) | 0.002    |
| <b>Occupational group</b>                          |                           |             |          |                           |             |          |
| unskilled                                          | 1                         |             |          | 1                         |             |          |
| skilled                                            | 0.88                      | (0.86-0.91) | <0.001   | 0.91                      | (0.88-0.94) | <0.001   |
| specialists                                        | 1.03                      | (0.99-1.08) | 0.127    | 0.81                      | (0.78-0.83) | <0.001   |

|                           |                           |             |        |                           |             |        |
|---------------------------|---------------------------|-------------|--------|---------------------------|-------------|--------|
| highly qualified          | 0.82                      | (0.77-0.88) | <0.001 | 0.79                      | (0.73-0.86) | <0.001 |
| missing                   | 0.78                      | (0.74-0.82) | <0.001 | 0.63                      | (0.58-0.67) | <0.001 |
| <b>Age</b>                | 1.15                      | (1.14-1.15) | <0.001 | 1.13                      | (1.12-1.13) | <0.001 |
| Number of subjects        | 407,274                   |             |        | 293,570                   |             |        |
| Number of observations    | 2,835,451                 |             |        | 1,973,699                 |             |        |
| Wald Chi <sup>2</sup> (p) | 29770.89 (df=14) (<0.001) |             |        | 18193.65 (df=14) (<0.001) |             |        |

**Model 3: Interaction year\*occupational group**

|                                |                          |             |        |                          |             |        |
|--------------------------------|--------------------------|-------------|--------|--------------------------|-------------|--------|
| <b>Year</b>                    | 1.09                     | (1.08-1.09) | <0.001 | 1.06                     | (1.06-1.07) | <0.001 |
| <b>Occupational group</b>      |                          |             |        |                          |             |        |
| unskilled                      | 1                        |             |        | 1                        |             |        |
| skilled                        | 0.80                     | (0.76-0.84) | <0.001 | 0.88                     | (0.82-0.94) | <0.001 |
| specialists                    | 1.03                     | (0.94-1.12) | 0.555  | 0.85                     | (0.80-0.91) | <0.001 |
| highly qualified               | 0.71                     | (0.60-0.84) | <0.001 | 0.68                     | (0.56-0.83) | <0.001 |
| missing                        | 0.89                     | (0.82-0.97) | <0.001 | 0.81                     | (0.71-0.91) | 0.001  |
| <b>Year*occupational group</b> |                          |             |        |                          |             |        |
| unskilled                      | 1                        |             |        | 1                        |             |        |
| skilled                        | 1.01                     | (1.00-1.02) | 0.091  | 1.01                     | (1.00-1.01) | 0.205  |
| specialists                    | 1.00                     | (0.99-1.01) | 0.676  | 1.00                     | (0.99-1.01) | 0.682  |
| highly qualified               | 1.02                     | (1.00-1.04) | 0.044  | 1.02                     | (1.00-1.05) | 0.067  |
| missing                        | 0.98                     | (0.97-0.99) | <0.001 | 0.96                     | (0.94-0.97) | <0.001 |
| <b>Educational level</b>       |                          |             |        |                          |             |        |
| low                            | 1                        |             |        | 1                        |             |        |
| high                           | 0.68                     | (0.63-0.74) | <0.001 | 0.62                     | (0.57-0.67) | <0.001 |
| missing                        | 0.87                     | (0.84-0.90) | <0.001 | 0.94                     | (0.91-0.98) | 0.002  |
| <b>Income</b>                  |                          |             |        |                          |             |        |
| low                            | 1                        |             |        | 1                        |             |        |
| middle                         | 0.83                     | (0.79-0.86) | <0.001 | 0.92                     | (0.89-0.94) | <0.001 |
| high                           | 0.72                     | (0.69-0.75) | <0.001 | 0.91                     | (0.88-0.95) | <0.001 |
| missing                        | 0.83                     | (0.80-0.87) | <0.001 | 1.05                     | (1.02-1.09) | 0.001  |
| <b>Age</b>                     | 1.14                     | (1.14-1.15) | <0.001 | 1.13                     | (1.12-1.13) | <0.001 |
| Number of subjects             | 407,274                  |             |        | 293,570                  |             |        |
| Number of observations         | 2,835,451                |             |        | 1,973,699                |             |        |
| Wald Chi <sup>2</sup> (p)      | 29951.4 (df=14) (<0.001) |             |        | 18287.8 (df=14) (<0.001) |             |        |

OR odds ratio, 95%-CI 95%-confidence interval, p p-value, df degrees of freedom
