# Supplementary material for: Widening inequalities in multimorbidity? Time trends among the working population between 2005 and 2015 based on German health insurance data
Source: Int J Equity Health. 2018 Jul 16;17:103. doi: 10.1186/s12939-018-0815-z (PMC6048702; doi:10.1186/s12939-018-0815-z)
Supplement: Supplementary file 2 — Chronic conditions and ICD-10-GM codes used in the study. (PDF 278 kb) [file 12939_2018_815_MOESM2_ESM.pdf]

## **Additional file 2**

### **Widening inequalities in multimorbidity? Time trends among the working population between 2005 and 2015 based on German health insurance data**

Juliane Tetzlaff<sup>1</sup>, Jelena Epping<sup>1</sup>, Stefanie Sperlich<sup>1</sup>, Sveja Eberhard<sup>2</sup>, Jona Theodor Stahmeyer<sup>2</sup>, Siegfried Geyer<sup>1</sup>

<sup>1</sup> Medical Sociology Unit, Hannover Medical School, Hannover, Germany

<sup>2</sup> AOK Niedersachsen- Statutory Health Insurance of Lower Saxony, Hannover, Germany

Additional file 2. Chronic conditions and ICD-10-GM codes used in the study

| Chronic condition                           | ICD-10-GM Codes                                                                                                                                 |
|---------------------------------------------|-------------------------------------------------------------------------------------------------------------------------------------------------|
| Hypertension                                | I10-I15                                                                                                                                         |
| Lipid metabolism disorders                  | E78                                                                                                                                             |
| Chronic low back pain                       | M40-M45, M47, M48.0-M48.2, M48.5-M48.9, M50-M54                                                                                                 |
| Severe vision reduction                     | H17-H18, H25-H28, H31, H33, H34.1-H34.2, H34.8-H34.9, H35-H36, H40, H43, H47, H54                                                               |
| Osteoarthritis                              | M15-M19                                                                                                                                         |
| Diabetes mellitus                           | E10-E14                                                                                                                                         |
| Chronic ischemic heart disease              | I20, I21, I25                                                                                                                                   |
| Thyroid dysfunction                         | E01-E05, E06.1-E06.3, E06.5, E06.9, E07                                                                                                         |
| Cardiac arrhythmias                         | I44-I45, I46.0, I46.9, I47-I48, I49.1-I49.9                                                                                                     |
| Obesity                                     | E66                                                                                                                                             |
| Purine/pyrimidine metabolism disorders/Gout | E79, M10                                                                                                                                        |
| Prostatic hyperplasia                       | N40                                                                                                                                             |
| Lower limb varicosis                        | I83, I87.2                                                                                                                                      |
| Liver disease                               | K70, K71.3-K71.5, K71.7, K72.1, K72.7, K72.9, K73-K74, K76                                                                                      |
| Depression                                  | F32-F33                                                                                                                                         |
| Asthma/COPD                                 | J40-J45, J47                                                                                                                                    |
| Noninflammatory gynecological problems      | N81, N84-N90, N93, N95                                                                                                                          |
| Atherosclerosis/PAOD                        | I65-I66, I67.2, I70, I73.9                                                                                                                      |
| Osteoporosis                                | M80-M82                                                                                                                                         |
| Renal insufficiency                         | N18-N19                                                                                                                                         |
| Cerebral ischemia/Chronic stroke            | I60-I64, I69, G45                                                                                                                               |
| Cardiac insufficiency                       | I50                                                                                                                                             |
| Severe hearing loss                         | H90, H91.0, H91.1, H91.3, H91.8, H91.9                                                                                                          |
| Chronic cholecystitis/Gallstones            | K80, K81.1                                                                                                                                      |
| Somatoform disorders                        | F45                                                                                                                                             |
| Intestinal diverticulosis                   | K57                                                                                                                                             |
| Rheumatoid arthritis/Chronic polyarthritis  | M05-M06, M79.0                                                                                                                                  |
| Cardiac valve disorders                     | I34-I37                                                                                                                                         |
| Neuropathies                                | G50-G64                                                                                                                                         |
| Dizziness                                   | H81-H82, R42                                                                                                                                    |
| Dementia                                    | F00-F03, F05.1, G30, G31                                                                                                                        |
| Urinary incontinence                        | N39.3-N39.4, R32                                                                                                                                |
| Urinary tract calculi                       | N20                                                                                                                                             |
| Anemia                                      | D50-D53, D55-D58, D59.0-D59.2, D59.4-D59.9, D60.0, D60.8, D60.9, D61, D63-D64                                                                   |
| Anxiety                                     | F40-F41                                                                                                                                         |
| Psoriasis                                   | L40                                                                                                                                             |
| Migraine/chronic headache                   | G43, G44                                                                                                                                        |
| Parkinson's disease                         | G20-G22                                                                                                                                         |
| Cancers                                     | C00-C14, C15-C26, C30-C39, C40-C41, C43-C44, C45-C49, C50, C51-C58, C60-C63, C64-C68, C69-C72, C73-C75, C81-C96, C76-C80, C97, D00-D09, D37-D48 |
| Allergies                                   | H01.1, J30, L23, L27.2, L56.4, K52.2, K90.0, T78.1, T78.4, T88.7                                                                                |
| Chronic gastritis/GERD                      | K21, K25.4-K25.9, K26.4-K26.9, K27.4-K27.9, K28.4-K28.9, K29.2-K29.9                                                                            |
| Sexual dysfunction                          | F52, N48.4                                                                                                                                      |
| Insomnia                                    | G47, F51                                                                                                                                        |
| Tobacco abuse                               | F17                                                                                                                                             |
| Hypotension                                 | I95                                                                                                                                             |

ICD-10-GM International Statistical Classification of Diseases and Related Health Problems, 10<sup>th</sup> Revision, German Modification. Selection of chronic conditions adapted from: van den Bussche H, Koller D, Kolonko T, Hansen H, Wegscheider K, Glaeske G, et al. Which chronic diseases and disease combinations are specific to multimorbidity in the elderly? Results of a claims data based cross-sectional study in Germany. BMC public

health. 2011;11:101. The original set of chronic conditions includes 46 groups. The group “haemorrhoids” was excluded due to changes of the ICD-10-GM code during the study period.
